# Supplementary material for: The Natterin Proteins Diversity: A Review on Phylogeny, Structure, and Immune Function
Source: MDPI journal article supplement (doi:10.3390/toxins13080538), 2021-07-31
Supplement: s1 [file s1]

# Supplementary Materials: The Natterin Proteins Diversity: A Review on Phylogeny, Structure, and Immune Function

Carla Lima, Geonildo Rodrigo Disner, Maria Alice Pimentel Falcão, Ana Carolina Seni-Silva, Adolfo Luis Almeida Maleski, Milena Marcolino Souza, Mayara Cristina Reis Tonello and Monica Lopes-Ferreira

**Table S3.** List of the fish species included in the group of proteins Natterin with their respective Natterin-like genes and proteins/isoforms IDs.

| Scientific name                      | Gene symbols                                                                                                                                                                                                                                                                                                                                                 | Protein and Isoforms ID                                                                                                                                                                                                                                                                  |
|--------------------------------------|--------------------------------------------------------------------------------------------------------------------------------------------------------------------------------------------------------------------------------------------------------------------------------------------------------------------------------------------------------------|------------------------------------------------------------------------------------------------------------------------------------------------------------------------------------------------------------------------------------------------------------------------------------------|
| NCBI                                 |                                                                                                                                                                                                                                                                                                                                                              |                                                                                                                                                                                                                                                                                          |
| <i>Acanthochromis polyacanthus</i>   | LOC110972886; LOC110971679; LOC110965958; LOC110965957; LOC110965951; LOC110965950; LOC110965949; LOC110965948; LOC110965947; LOC110945731                                                                                                                                                                                                                   | XP_022078957.1; XP_022077763.1; XP_022070850.1; XP_022070849.1; XP_022070845.1; XP_022070844.1; XP_022070843.1; XP_022070842.1; XP_022070841.1; XP_022043008.1                                                                                                                           |
| <i>Acipenser ruthenus</i>            | LOC117965185; LOC117422504; LOC117422503; LOC117401683; LOC117396711; LOC117396710                                                                                                                                                                                                                                                                           | XP_034766114.1; XP_033893513.2; XP_033893512.1; XP_033858368.2; XP_033850746.1; XP_033850745.2                                                                                                                                                                                           |
| <i>Amphiprion ocellaris</i>          | LOC111584976; LOC111584981; LOC111584980; LOC111584977                                                                                                                                                                                                                                                                                                       | XP_035796893.1; XP_023150123.1; XP_023150115.1; XP_023150116.1; XP_023150121.1; XP_035796892.1; XP_023150117.1                                                                                                                                                                           |
| <i>Anabas testudineus</i>            | LOC113150921; LOC113150359; LOC113150357; LOC113151032; LOC113151031; LOC113151025; LOC113150512; LOC113150511; LOC113150506; LOC113150505; LOC113150496; LOC113150356; LOC113150355; LOC113150354; LOC113151081; LOC113151043; LOC113151040; LOC113150967; LOC113150509; LOC113150508; LOC113150507; LOC113150503; LOC113150502; LOC113150360; LOC113150353 | XP_026199457.1; XP_026199458.1; XP_026198609.1; XP_026198608.1; XP_026198606.1; XP_026198607.1; XP_026199622.1; XP_026199621.1; XP_026199612.1; XP_026198845.1; XP_026198844.1; XP_026198843.1; XP_033182037.1; XP_026198837.1; XP_026198605.1; XP_026198604.1; XP_026198603.1; N/A (11) |
| <i>Anarrhichthys ocellatus</i>       | LOC116400752; LOC116396188; LOC116396186; LOC116396185; LOC116396179; LOC116396120; LOC116378516; LOC116378017; LOC116378016                                                                                                                                                                                                                                 | XP_031734625.1; XP_031726488.1; XP_031726486.1; XP_031726485.1; XP_031726472.1; XP_031726392.1; XP_031696264.1; N/A (2)                                                                                                                                                                  |
| <i>Archocentrus centrarchus</i>      | LOC115776052; LOC115776086; LOC115775888                                                                                                                                                                                                                                                                                                                     | XP_030579517.1; XP_030579516.1; XP_030579570.1; XP_030579258.1                                                                                                                                                                                                                           |
| <i>Astatotilapia calliptera</i>      | LOC113033714; LOC113034237; LOC113032999; LOC113034238; LOC113034196                                                                                                                                                                                                                                                                                         | XP_026043554.1; XP_026043556.1; XP_026044423.1; XP_026042003.1; N/A (2)                                                                                                                                                                                                                  |
| <i>Astyanax mexicanus</i>            | LOC103027322; LOC111191763; LOC111194308; LOC103027025                                                                                                                                                                                                                                                                                                       | XP_007253908.2; XP_022523356.1; XP_022523353.1; XP_022533734.1; XP_022523255.1                                                                                                                                                                                                           |
| <i>Austrofundulus limnaeus</i>       | LOC106521840; LOC106521839; LOC106521842                                                                                                                                                                                                                                                                                                                     | XP_013870038.1; XP_013870037.1; N/A (1)                                                                                                                                                                                                                                                  |
| <i>Betta splendens</i>               | LOC114870628; LOC114862698; LOC114862699; LOC114862486                                                                                                                                                                                                                                                                                                       | XP_029031351.1; XP_029031362.1; XP_029031373.1; XP_029031382.1; XP_029019122.1; XP_029019123.1; XP_029019124.1; XP_029019125.1; XP_029019127.1; XP_029018660.1                                                                                                                           |
| <i>Boleophthalmus pectinirostris</i> | LOC110172491                                                                                                                                                                                                                                                                                                                                                 | XP_020794036.1                                                                                                                                                                                                                                                                           |
| <i>Carassius auratus</i>             | LOC113118046; LOC113067465; LOC113037668                                                                                                                                                                                                                                                                                                                     | XP_026142691.1; XP_026142692.1; XP_026095673.1; XP_026050760.1                                                                                                                                                                                                                           |
| <i>Chanos chanos</i>                 | LOC115827962; LOC115827961;                                                                                                                                                                                                                                                                                                                                  | XP_030647716.1; XP_030647715.1;                                                                                                                                                                                                                                                          |
| <i>Clupea harengus</i>               | LOC116220761; LOC105901666; LOC116217906; LOC105906341; LOC105906166; LOC105901667; LOC116222550                                                                                                                                                                                                                                                             | XP_031424776.1; XP_031424775.1; XP_031424777.1; XP_031424778.1; XP_012684608.2; XP_031432742.1; XP_031424779.1; XP_012689920.2; XP_031424780.1; XP_031431589.1; N/A (1)                                                                                                                  |
| <i>Cottoberca gobio</i>              | LOC115013931; LOC115013914; LOC115013894; LOC115013596; LOC115013910                                                                                                                                                                                                                                                                                         | XP_029296358.1; XP_029296339.1; XP_029296316.1; XP_029295877.1; N/A (1)                                                                                                                                                                                                                  |
| <i>Cyclopterus lumpus</i>            | LOC117736445; LOC117736998; LOC117736987; LOC117736986;                                                                                                                                                                                                                                                                                                      | XP_034397685.1; XP_034397684.1; XP_034398593.1; XP_034398576.1; XP_034398574.1;                                                                                                                                                                                                          |

|                                  |                                                                                                                                    |                                                                                                                                                                                                                                                                                            |
|----------------------------------|------------------------------------------------------------------------------------------------------------------------------------|--------------------------------------------------------------------------------------------------------------------------------------------------------------------------------------------------------------------------------------------------------------------------------------------|
|                                  | LOC117735835; LOC117735834; LOC117735833;<br>LOC117735832                                                                          | XP_034396614.1; XP_034396612.1; XP_034396611.1; XP_034396610.1                                                                                                                                                                                                                             |
| <i>Cynoglossus semilaevis</i>    | LOC107988277; LOC103398022; LOC103398021                                                                                           | XP_016886653.2; XP_008334723.1; XP_008334722.1                                                                                                                                                                                                                                             |
| <i>Cyprinodon variegatus</i>     | LOC107092866; LOC107091596; LOC107091586;<br>LOC107087858; LOC107087312                                                            | XP_015243042.1; XP_015241089.1; XP_015241077.1; XP_015235140.1;<br>XP_015234320.1                                                                                                                                                                                                          |
| <i>Cyprinus carpio</i>           | LOC109093544; LOC109075233; LOC109059965;<br>LOC109048558<br>LOC109048500; LOC109095792; LOC109072820;<br>LOC109054861             | XP_018962823.1; XP_018946706.1; XP_018932680.1; XP_018921751.1;<br>XP_018921710.1; N/A (3)                                                                                                                                                                                                 |
| <i>Danio rerio</i>               | LOC101882550; LOC795232; LOC564660;<br>LOC564481<br>aep1; si:dkryp-32g11.8; jac1; jac2; jac3; jac4                                 | XP_021325134.1; XP_021329119.1; XP_017212453.1; NP_001373566.1;<br>NP_001373496.1; NP_001013322.1; XP_001332452.2; XP_005166416.2;<br>XP_021333376.1; XP_689401.2; XP_001920106.1; XP_001335438.1                                                                                          |
| <i>Denticeps clupeoides</i>      | LOC114785644; LOC114785590                                                                                                         | XP_028827979.1; XP_028827846.1                                                                                                                                                                                                                                                             |
| <i>Echeneis naucrates</i>        | LOC115048490; LOC115048489                                                                                                         | XP_029365835.1; XP_029365834.1                                                                                                                                                                                                                                                             |
| <i>Electrophorus electricus</i>  | LOC113572950; LOC113572946; LOC118242386                                                                                           | XP_026858729.2; XP_026858721.2; N/A (1)                                                                                                                                                                                                                                                    |
| <i>Epinephelus lanceolatus</i>   | LOC117253166; LOC117253049; LOC117253206;<br>LOC117253205; LOC117253120; LOC117252549;<br>LOC117252547; LOC117252363; LOC117252343 | XP_033476433.1; XP_033476434.1; XP_033476276.1; XP_033476277.1;<br>XP_033476485.1; XP_033476484.1; XP_033476370.1; XP_033475455.1;<br>XP_033475453.1; XP_033475070.1; XP_033475041.1                                                                                                       |
| <i>Erpetoichthys calabaricus</i> | LOC114660653; LOC114661331; LOC114657151;<br>LOC114657149;<br>LOC114657148; LOC114657147; LOC114657145                             | XP_028669333.1; XP_028669330.1; XP_028669326.1; XP_028669327.1;<br>XP_028669323.1; XP_028669324.1; XP_028669322.1; XP_028669331.1;<br>XP_028669332.1; XP_028669329.1; XP_028669325.1; XP_028670378.1;<br>XP_028664731.1; XP_028664730.1; XP_028664729.1; XP_028664728.1;<br>XP_028664726.1 |
| <i>Esox lucius</i>               | LOC105012483; LOC105014671; LOC105014670;<br>LOC105009886                                                                          | XP_010871658.1; XP_010871659.2; XP_019905734.1; XP_010875473.1;<br>XP_010875472.2; NP_001291101.1                                                                                                                                                                                          |
| <i>Etheostoma cragini</i>        | LOC117944414; LOC117944419; LOC117944417;<br>LOC117944416; LOC117944415                                                            | XP_034727099.1; XP_034727100.1; XP_034727106.1; XP_034727104.1;<br>XP_034727103.1; XP_034727101.1                                                                                                                                                                                          |
| <i>Etheostoma spectabile</i>     | LOC116689688; LOC116689878; LOC116689689;<br>LOC116689515; LOC116689372; LOC116689687                                              | XP_032372170.1; XP_032372171.1; XP_032372421.1; XP_032372172.1;<br>XP_032371965.1; XP_032371798.1; N/A (1)                                                                                                                                                                                 |
| <i>Fundulus heteroclitus</i>     | LOC105921682; LOC105922588; LOC105922613;<br>LOC105922611; LOC105922587; LOC118564905                                              | XP_035999639.1; XP_035999640.1; XP_012713960.2; XP_036000698.1;<br>XP_036000190.1; N/A (1)                                                                                                                                                                                                 |
| <i>Gadus morhua</i>              | LOC115548330; LOC115549398; LOC115550779                                                                                           | XP_030218725.1; XP_030220404.1; XP_030221930.1                                                                                                                                                                                                                                             |
| <i>Gouania willdenowii</i>       | LOC114470242; LOC114470241; LOC114469859;<br>LOC114469797                                                                          | XP_028314104.1; XP_028314103.1; XP_028313537.1; XP_028313410.1                                                                                                                                                                                                                             |
| <i>Gymnodraco acuticeps</i>      | LOC117555386; LOC117555367; LOC117555398                                                                                           | XP_034086171.1; XP_034086172.1; XP_034086174.1;<br>XP_034086175.1; XP_034086136.1; N/A (1)                                                                                                                                                                                                 |
| <i>Haplochromis burtoni</i>      | LOC102304550; LOC102304044; LOC102303736;                                                                                          | XP_005947701.1; XP_005947702.1; XP_005947699.1;<br>XP_005947701.1; XP_005947702.1; XP_005947698.1                                                                                                                                                                                          |
| <i>Hippocampus comes</i>         | LOC109524652; LOC109524648; LOC109524650<br>LOC109524649; LOC109524643; LOC109524642                                               | XP_019740213.1; XP_019740214.1; XP_019740210.1; XP_019740209.1;<br>XP_019740212.1; XP_019740211.1; XP_019740204.1; XP_019740203.1                                                                                                                                                          |
| <i>Hippoglossus hippoglossus</i> | LOC117768410; LOC117768415                                                                                                         | XP_034452610.1; XP_034452611.1; XP_034452619.1                                                                                                                                                                                                                                             |
| <i>Hippoglossus stenolepis</i>   | LOC118115226; LOC118115225                                                                                                         | XP_035022137.1; XP_035022136.1                                                                                                                                                                                                                                                             |
| <i>Ictalurus punctatus</i>       | LOC108277208; LOC108256021; LOC108256022;<br>LOC108281066;<br>LOC108281062; LOC108254749; LOC108254737;<br>LOC108277228            | XP_017345216.1; XP_017345225.1; XP_017307974.1; XP_017307975.1;<br>XP_017307974.1;<br>XP_017352100.1; XP_017352097.1; XP_017305510.1; XP_017305499.1; N/A (1)                                                                                                                              |
| <i>Kryptolebias marmoratus</i>   | LOC108242784; LOC108242761; LOC108242759;<br>LOC108242786                                                                          | XP_017283302.1; XP_017283303.1; XP_024864245.1; XP_017283277.2;<br>XP_017283277.2; XP_024864245.1                                                                                                                                                                                          |
| <i>Labrus bergyllta</i>          | LOC110004881; LOC110004595; LOC110004882;<br>LOC110003748;<br>LOC110003723; LOC110002607; LOC110005408;<br>LOC110003747            | XP_029138746.1; XP_020516030.1; XP_029138670.1; XP_029138671.1;<br>XP_020516031.2; XP_029138368.1; XP_020514928.1; XP_029138081.1; N/A (1)                                                                                                                                                 |
| <i>Larimichthys crocea</i>       | LOC104935236; LOC104934802                                                                                                         | XP_010749348.2; XP_010748853.3                                                                                                                                                                                                                                                             |
| <i>Lates calcarifer</i>          | LOC108881648; LOC108881647; LOC108881649;                                                                                          | XP_018529232.1; XP_018529233.1; XP_018529229.1; XP_018529230.1;                                                                                                                                                                                                                            |

|                                    |                                                                                                                                                                                    |                                                                                                                                                                                                                                                                         |
|------------------------------------|------------------------------------------------------------------------------------------------------------------------------------------------------------------------------------|-------------------------------------------------------------------------------------------------------------------------------------------------------------------------------------------------------------------------------------------------------------------------|
|                                    | LOC108881646; LOC108881644; LOC108881593                                                                                                                                           | XP_018529234.1; XP_018529228.1; XP_018529223.1; N/A (1)                                                                                                                                                                                                                 |
| <i>Latimeria chalumnae</i>         | LOC102351619                                                                                                                                                                       | XP_006007686.2                                                                                                                                                                                                                                                          |
| <i>Lepisosteus oculatus</i>        | LOC102686741; LOC102686534; LOC102685725;<br>LOC102685516; LOC102685315;<br>LOC102685116; LOC102684513; LOC102683468;<br>LOC102685926                                              | XP_006630214.1; XP_006630213.1; XP_015201480.1; XP_006630210.1;<br>XP_006630209.1;<br>XP_015201478.1; XP_006628335.1; XP_015217114.1; N/A (1)                                                                                                                           |
| <i>Mastacembelus armatus</i>       | LOC113139048; LOC113139041; LOC113138598;<br>LOC113138597; LOC113138594                                                                                                            | XP_026177782.1; XP_026177776.1; XP_026176934.1; XP_026176932.1;<br>XP_026176928.1                                                                                                                                                                                       |
| <i>Maylandia zebra</i>             | LOC101480981; LOC101486334; LOC101485557;<br>LOC101480698; LOC101485828                                                                                                            | XP_023008332.1; XP_023008333.1; XP_004555788.1; XP_004555785.1;<br>XP_014263622.1; XP_023008331.1; XP_004555787.1                                                                                                                                                       |
| <i>Monopterus albus</i>            | LOC109957452; LOC109957451; LOC109957450;<br>LOC109957449                                                                                                                          | XP_020451000.1; XP_020450999.1; XP_020450998.1; XP_020450997.1                                                                                                                                                                                                          |
| <i>Morone saxatilis</i>            | LOC118326119; LOC118326022; LOC118325584;<br>LOC118325583                                                                                                                          | XP_035514930.1; XP_035514798.1; XP_035514196.1; XP_035514195.1                                                                                                                                                                                                          |
| <i>Myripristis murdjan</i>         | LOC115365642; LOC115365590                                                                                                                                                         | XP_029916599.1; XP_029916535.1                                                                                                                                                                                                                                          |
| <i>Neolamprologus brichardi</i>    | LOC102791442; LOC102791148; LOC102790584;<br>LOC102790864                                                                                                                          | XP_035766627.1; XP_035766593.1; XP_006797808.2; N/A (1)                                                                                                                                                                                                                 |
| <i>Nothobranchius furzeri</i>      | LOC107395310; LOC107395311                                                                                                                                                         | XP_015830152.1; XP_015830153.1                                                                                                                                                                                                                                          |
| <i>Notolabrus celidotus</i>        | LOC117819157; LOC117819219; LOC117818360;<br>LOC117819218; LOC117819388;<br>LOC117819291; LOC117819186; LOC117818989;<br>LOC117818538; LOC117818536<br>LOC117818361                | XP_034548286.1; XP_034548287.1; XP_034548364.1; XP_034548366.1;<br>XP_034548367.1;<br>XP_034547094.1; XP_034547095.1; XP_034548362.1; XP_034548363.1;<br>XP_034548598.1;<br>XP_034548474.1; XP_034548320.1; XP_034548053.1; XP_034547367.1;<br>XP_034547365.1; N/A (1)  |
| <i>Notothenia coriiceps</i>        | LOC104957312; LOC104943620                                                                                                                                                         | XP_010783235.1; XP_010767376.1                                                                                                                                                                                                                                          |
| <i>Oncorhynchus keta</i>           | LOC118393021; LOC118358151; LOC118357833                                                                                                                                           | XP_035641051.1; XP_035591534.1; XP_035591045.1                                                                                                                                                                                                                          |
| <i>Oncorhynchus kisutch</i>        | LOC109895078; LOC109873336; LOC109875722                                                                                                                                           | XP_020344314.1; XP_031686132.1; XP_031674702.1; XP_031659281.1;<br>XP_031659284.1                                                                                                                                                                                       |
| <i>Oncorhynchus mykiss</i>         | LOC110492680; LOC110492679; LOC110492684;<br>LOC110535045; LOC110525452;<br>LOC110492682; LOC110492676; LOC110535046;<br>LOC110492916; LOC110492683;<br>LOC110492677               | XP_021422808.1; XP_021422813.1; XP_021422805.1; XP_021422806.1;<br>XP_021422817.1;<br>XP_021475594.1; XP_021461251.1; XP_021422815.1; XP_021422803.1; N/A (4)                                                                                                           |
| <i>Oncorhynchus nerka</i>          | LOC115140663; LOC115139847; LOC115111420                                                                                                                                           | XP_029534857.1; XP_029533533.1; XP_029493305.1                                                                                                                                                                                                                          |
| <i>Oreochromis aureus</i>          | LOC116333913; LOC116316320; LOC116316319                                                                                                                                           | XP_031613067.1; XP_031590732.1; XP_031590731.1                                                                                                                                                                                                                          |
| <i>Oreochromis niloticus</i>       | LOC109204646; LOC102078591; LOC100690731;<br>LOC112848328; LOC112848327; LOC109204627;<br>LOC109204394; LOC106098185; LOC100712276;<br>LOC100699724;<br>LOC100699185; LOC102076794 | XP_019221741.1; XP_019221742.1; XP_019221678.1; XP_019221679.1;<br>XP_019221743.1;<br>XP_013126388.2; XP_025767791.1; XP_025767789.1; XP_019221680.1;<br>XP_025752615.1;<br>XP_013126389.1; XP_019220826.1; XP_003460225.2; XP_003460223.2; N/A (1)                     |
| <i>Oryzias latipes</i>             | LOC110017492; LOC101156471; LOC110017491;<br>LOC105354800                                                                                                                          | XP_020569178.1; XP_004066450.1; XP_020569176.1; XP_011477929.1                                                                                                                                                                                                          |
| <i>Oryzias melastigma</i>          | LOC112148938; LOC112148433; LOC112141888;<br>LOC112140920                                                                                                                          | XP_036069659.1; XP_036065765.1; XP_024120858.1; XP_024119711.1                                                                                                                                                                                                          |
| <i>Pangasianodon hypophthalmus</i> | LOC113537151; LOC113537127                                                                                                                                                         | XP_026787297.1; XP_026787254.1                                                                                                                                                                                                                                          |
| <i>Paralichthys olivaceus</i>      | LOC109646373; LOC109623586                                                                                                                                                         | XP_019967672.1; XP_019933636.1                                                                                                                                                                                                                                          |
| <i>Parambassis ranga</i>           | LOC114442039; LOC114441490; LOC114442043;<br>LOC114442041; LOC114441673; LOC114442042;<br>LOC114441719; LOC114441718; LOC114441612                                                 | XP_028271100.1; XP_028271101.1; XP_028271102.1; XP_028270247.1;<br>XP_028270248.1; XP_028270249.1; XP_028271107.1; XP_028271108.1;<br>XP_028271103.1; XP_028271104.1; XP_028270505.1; XP_028270506.1;<br>XP_028271105.1; XP_028270577.1; XP_028270576.1; XP_028270413.1 |

|                                      |                                                                                                                                                                                           |                                                                                                                                                                                                                                            |
|--------------------------------------|-------------------------------------------------------------------------------------------------------------------------------------------------------------------------------------------|--------------------------------------------------------------------------------------------------------------------------------------------------------------------------------------------------------------------------------------------|
| <i>Paramormyrops kingsleyae</i>      | LOC111838587                                                                                                                                                                              | XP_023657493.1                                                                                                                                                                                                                             |
| <i>Perca flavescens</i>              | LOC114555804; LOC114556283; LOC114556282;<br>LOC114556281; LOC114556279;<br>LOC114556278; LOC114556277; LOC114556276;<br>LOC114556275; LOC114556273;<br>LOC114556272                      | XP_028434306.1; XP_028434994.1; XP_028434993.1; XP_028434992.1;<br>XP_028434990.1; XP_028434989.1; XP_028434987.1; XP_028434986.1;<br>XP_028434985.1; XP_028434984.1; XP_028434983.1                                                       |
| <i>Periophthalmus magnuspinnatus</i> | LOC117376833; LOC117376832                                                                                                                                                                | XP_033829269.1; XP_033829267.1                                                                                                                                                                                                             |
| <i>Poecilia formosa</i>              | LOC107833069; LOC107832875; LOC103152651;<br>LOC103152639;<br>LOC103152638; LOC103152637; LOC103131408                                                                                    | XP_016516744.1; XP_016516735.1; XP_007573269.2; XP_016516738.1;<br>XP_007573254.1; XP_007573252.1; XP_007543104.1                                                                                                                          |
| <i>Poecilia latipinna</i>            | LOC106964481; LOC106962433; LOC106936032;<br>LOC106936031;<br>LOC106936024; LOC106936023; LOC106936025                                                                                    | XP_014915517.1; XP_014912337.1; XP_014872294.1; XP_014872293.1;<br>XP_014872285.1; XP_014872284.1; N/A (1)                                                                                                                                 |
| <i>Poecilia mexicana</i>             | LOC106929144; LOC106929143; LOC106929142;<br>LOC106929132;<br>LOC106929131; LOC106929128; LOC106913515                                                                                    | XP_014861318.1; XP_014861317.1; XP_014861316.1; XP_014861301.1;<br>XP_014861300.1; XP_014861295.1; XP_014835615.1                                                                                                                          |
| <i>Poecilia reticulata</i>           | LOC103470712; LOC103470711; LOC103470710;<br>LOC108166572                                                                                                                                 | XP_008417566.1; XP_008417564.1; XP_008417563.1; N/A (1)                                                                                                                                                                                    |
| <i>Pseudochaenichthys georgianus</i> | LOC117451939; LOC117451873                                                                                                                                                                | XP_033946207.1; XP_033946114.1                                                                                                                                                                                                             |
| <i>Pundamilia nyererei</i>           | LOC102196904; LOC102215630; LOC102215341                                                                                                                                                  | XP_005730650.1; XP_005730652.1; XP_005730718.1; XP_005730717.1                                                                                                                                                                             |
| <i>Pygocentrus nattereri</i>         | LOC108440524; LOC108440525; LOC108440519;<br>LOC108440513;<br>LOC108431588; LOC108416907; LOC108412640;<br>LOC108412639                                                                   | XP_017574907.1; XP_017574909.1; XP_017574901.1; XP_017574891.1;<br>XP_017560326.1; XP_017545225.1; XP_017540238.1; XP_017540237.1                                                                                                          |
| <i>Salarias fasciatus</i>            | LOC115398569; LOC115397816; LOC115385734;<br>LOC115385726                                                                                                                                 | XP_029961263.1; XP_029960147.1; XP_029943660.1; XP_029943654.1                                                                                                                                                                             |
| <i>Salmo salar</i>                   | nattl; LOC106585406; LOC106592833;<br>LOC106598085; LOC106597996; LOC106585404;<br>LOC106580260; LOC106566391; LOC106597753;<br>LOC106590951; LOC106566392; LOC106566390;<br>LOC106566389 | NP_001134309.1; XP_014027037.1; XP_014027038.1; XP_014027036.1;<br>XP_014027039.1; XP_014027040.1; XP_014039655.1; XP_014044638.1;<br>XP_014044567.1; XP_014027033.1; XP_014016555.1; XP_013989840.1; N/A<br>(5)                           |
| <i>Salmo trutta</i>                  | LOC115164743; LOC115199896; LOC115199582;<br>LOC115195641; LOC115164744                                                                                                                   | XP_029573366.1; XP_029618292.1; XP_029617775.1; XP_029611579.1; N/A<br>(1)                                                                                                                                                                 |
| <i>Salvelinus alpinus</i>            | LOC111974875; LOC111974874; LOC111953291                                                                                                                                                  | XP_023858706.1; XP_023858705.1; XP_023828243.1                                                                                                                                                                                             |
| <i>Sander lucioperca</i>             | LOC116054306; LOC116054307; LOC118496505;<br>LOC116054478; LOC116054465;<br>LOC116054065; LOC116054064; LOC116054063;<br>LOC116054062                                                     | XP_031161648.1; XP_031161649.1; XP_035852969.1; XP_031161650.1;<br>XP_035852972.1;<br>XP_035852974.1; XP_035852977.1; XP_035864307.1; XP_031161909.1;<br>XP_031161888.1;<br>XP_031161243.1; XP_031161242.1; XP_031161240.1; XP_031161239.1 |
| <i>Scleropages formosus</i>          | LOC114912550; LOC108923642; LOC108930950;<br>LOC108930949                                                                                                                                 | XP_029115652.1; XP_029115653.1; XP_018590053.1; XP_018590054.1;<br>XP_018601972.1; XP_018601971.1                                                                                                                                          |
| <i>Scophthalmus maximus</i>          | LOC118314101; LOC118314103; LOC118314102;<br>LOC118313943                                                                                                                                 | XP_035496142.1; XP_035496145.1; XP_035496144.1; XP_035495834.1                                                                                                                                                                             |
| <i>Seriola dumerili</i>              | LOC111238558; LOC111238552; LOC111238550;<br>LOC111238561; LOC111238559; LOC111238554                                                                                                     | XP_022623850.1; XP_022623843.1; XP_022623842.1; XP_022623852.1;<br>XP_022623851.1; XP_022623846.1                                                                                                                                          |
| <i>Seriola lalandi dorsalis</i>      | LOC111645714; LOC111645706; LOC111645703;<br>LOC111645701                                                                                                                                 | XP_023250786.1; XP_023250776.1; XP_023250770.1; XP_023250768.1                                                                                                                                                                             |
| <i>Sinocyclocheilus anshuiensis</i>  | LOC107685410; LOC107685411; LOC107703886;<br>LOC107685416; LOC107697465;<br>LOC107685415; LOC107685412; LOC107676233;<br>LOC107675366                                                     | XP_016337469.1; XP_016337470.1; XP_016337473.1; XP_016362173.1;<br>XP_016337476.1; N/A (5)                                                                                                                                                 |
| <i>Sinocyclocheilus grahami</i>      | LOC107580454; LOC107572566; LOC107572132;<br>LOC107571304; LOC107568250;<br>LOC107568249; LOC107553807; LOC107553787;<br>LOC107553785; LOC107574143;                                      | XP_016121641.1; XP_016114476.1; XP_016114032.1; XP_016113107.1;<br>XP_016109671.1;<br>XP_016109670.1; XP_016091601.1; XP_016091579.1; XP_016091578.1; N/A<br>(5)                                                                           |

|                                                      |                                                                                                                                                                                                                                                                                                                                                                                                          |                                                                                                                                                                                                                                                                                                                                                                                                                                                                                                                     |
|------------------------------------------------------|----------------------------------------------------------------------------------------------------------------------------------------------------------------------------------------------------------------------------------------------------------------------------------------------------------------------------------------------------------------------------------------------------------|---------------------------------------------------------------------------------------------------------------------------------------------------------------------------------------------------------------------------------------------------------------------------------------------------------------------------------------------------------------------------------------------------------------------------------------------------------------------------------------------------------------------|
|                                                      | LOC107553768; LOC107553767; LOC107553766;<br>LOC107553765                                                                                                                                                                                                                                                                                                                                                |                                                                                                                                                                                                                                                                                                                                                                                                                                                                                                                     |
| <i>Sinocyclocheilus rhinoceros</i>                   | LOC107745953; LOC107750790; LOC107745964;<br>LOC107745955; LOC107745954;<br>LOC107732150; LOC107715051; LOC107750780;<br>LOC107750779; LOC107735655;<br>LOC107735617; LOC107729343                                                                                                                                                                                                                       | XP_016415472.1; XP_016421795.1; XP_016415481.1; XP_016415474.1;<br>XP_016415473.1; XP_016398905.1; XP_016376580.1; N/A (5)                                                                                                                                                                                                                                                                                                                                                                                          |
| <i>Sparus aurata</i>                                 | LOC115581715; LOC115582173; LOC115581714;<br>LOC115581676;<br>LOC115581675; LOC115581674; LOC115581671                                                                                                                                                                                                                                                                                                   | XP_030272880.1; XP_030272881.1; XP_030273824.1; XP_030272879.1;<br>XP_030272824.1; XP_030272823.1; XP_030272822.1; N/A (1)                                                                                                                                                                                                                                                                                                                                                                                          |
| <i>Sphaeramia orbicularis</i>                        | LOC115426097; LOC115425776; LOC115425773;<br>LOC115425537                                                                                                                                                                                                                                                                                                                                                | XP_029999915.1; XP_029999931.1; XP_029999938.1; XP_029999902.1                                                                                                                                                                                                                                                                                                                                                                                                                                                      |
| <i>Stegastes partitus</i>                            | LOC103375365; LOC103374718; LOC103368923;<br>LOC103368914                                                                                                                                                                                                                                                                                                                                                | XP_008303846.1; XP_008303071.1; XP_008295688.1; XP_008295674.1                                                                                                                                                                                                                                                                                                                                                                                                                                                      |
| <i>Tachysurus fulvidraco</i>                         | LOC113637608; LOC113637596; LOC113637595;<br>LOC113637543                                                                                                                                                                                                                                                                                                                                                | XP_026994141.1; XP_026994116.1; XP_026994115.1; N/A (1)                                                                                                                                                                                                                                                                                                                                                                                                                                                             |
| <i>Takifugu rubripes</i>                             | LOC101080080; LOC101061072                                                                                                                                                                                                                                                                                                                                                                               | XP_029685569.1; XP_011613836.1                                                                                                                                                                                                                                                                                                                                                                                                                                                                                      |
| <i>Thalassophryne amazonica</i>                      | LOC117507937; LOC117507935; LOC117506200;<br>LOC117502539; LOC117511181;<br>LOC117511179; LOC117511178; LOC117511154;<br>LOC117509998; LOC117509997;<br>LOC117509883; LOC117509882; LOC117509876;<br>LOC117509873; LOC117509872;<br>LOC117509871; LOC117509869; LOC117509868;<br>LOC117509867; LOC117509866;<br>LOC117509865; LOC117507942; LOC117507938;<br>LOC117507762; LOC117507040;<br>LOC117506750 | XP_034023579.1; XP_034023580.1; XP_034023576.1; XP_034023577.1;<br>XP_034021587.1; XP_034021588.1; XP_034017472.1; XP_034017473.1;<br>XP_034027058.1; XP_034027056.1; XP_034027055.1; XP_034027023.1;<br>XP_034025496.1; XP_034025495.1; XP_034025402.1; XP_034025400.1;<br>XP_034025396.1; XP_034025394.1; XP_034025393.1; XP_034025391.1;<br>XP_034025390.1; XP_034025389.1; XP_034025388.1; XP_034025387.1;<br>XP_034025386.1; XP_034023585.1; XP_034023581.1; XP_034023462.1;<br>XP_034022621.1; XP_034022222.1 |
| <i>Trematomus bernacchii</i>                         | LOC117499337; LOC117473203; LOC117472357                                                                                                                                                                                                                                                                                                                                                                 | XP_034007571.1; XP_033974611.1; XP_033973395.1                                                                                                                                                                                                                                                                                                                                                                                                                                                                      |
| <i>Xiphophorus couchianus</i>                        | LOC114154796; LOC114154797                                                                                                                                                                                                                                                                                                                                                                               | XP_027890011.1; XP_027890013.1                                                                                                                                                                                                                                                                                                                                                                                                                                                                                      |
| <i>Xiphophorus hellerii</i>                          | LOC116729175; LOC116729620; LOC116729293;<br>LOC116729243; LOC116729623                                                                                                                                                                                                                                                                                                                                  | XP_032433435.1; XP_032433436.1; XP_032434181.1; XP_032433613.1;<br>XP_032433527.1; N/A (1)                                                                                                                                                                                                                                                                                                                                                                                                                          |
| <i>Xiphophorus maculatus</i>                         | LOC102218571; LOC102235791; LOC102223347;<br>LOC102218316                                                                                                                                                                                                                                                                                                                                                | XP_023198850.1; XP_023198851.1; XP_023199097.1; XP_023199098.1;<br>XP_023199805.1                                                                                                                                                                                                                                                                                                                                                                                                                                   |
| UNIPROT                                              |                                                                                                                                                                                                                                                                                                                                                                                                          |                                                                                                                                                                                                                                                                                                                                                                                                                                                                                                                     |
| <i>Anabarrilius grahami</i> (Barilius grahami)       | DPX16_2196; DPX16_2659                                                                                                                                                                                                                                                                                                                                                                                   | A0A3N0Z5Q4-1; A0A3N0Y4R9-1                                                                                                                                                                                                                                                                                                                                                                                                                                                                                          |
| <i>Channa argus</i>                                  | EXN66_Car011057; EXN66_Car011056;<br>EXN66_Car011033;<br>EXN66_Car011054; EXN66_Car011055;<br>EXN66_Car011053;                                                                                                                                                                                                                                                                                           | A0A6G1PYG8-1; A0A6G1PYG9-1; A0A6G1PYN7-1; A0A6G1PZF2-1;<br>A0A6G1PYT2-1; A0A6G1PYQ5-1                                                                                                                                                                                                                                                                                                                                                                                                                               |
| <i>Collichthys lucidus</i> (Sciaena lucida)          | D9C73_012990; D9C73_013011; D9C73_013010;<br>D9C73_012991                                                                                                                                                                                                                                                                                                                                                | A0A4U5USR6-1; A0A4U5UST4-1; A0A4U5USP8-1; A0A4U5USV2-1                                                                                                                                                                                                                                                                                                                                                                                                                                                              |
| <i>Ictalurus furcatus</i> (Pimelodus furcatus)       | NATTL                                                                                                                                                                                                                                                                                                                                                                                                    | E3TBY7-1                                                                                                                                                                                                                                                                                                                                                                                                                                                                                                            |
| <i>Labeo rohita</i> (Cyprinus rohita)                | ROHU_028553; ROHU_025781; ROHU_028551;<br>ROHU_028552; ROHU_007491; ROHU_028549;<br>ROHU_028879; ROHU_003160; ROHU_026098                                                                                                                                                                                                                                                                                | A0A498M4F8-1; A0A498MQR0-1; A0A498M2J8-1; A0A498M5V3-1;<br>A0A498MFS9; A0A498M1M4-1; A0A498M4E6-1; A0A498NW31;<br>A0A498MBY3                                                                                                                                                                                                                                                                                                                                                                                        |
| <i>Lethenteron camtschaticum</i> (Lampetra japonica) | N/A                                                                                                                                                                                                                                                                                                                                                                                                      | K7WEH5-1                                                                                                                                                                                                                                                                                                                                                                                                                                                                                                            |
| <i>Liparis tanakae</i>                               | NATT4_2; NATT3; NATT4_0; NATT4_1                                                                                                                                                                                                                                                                                                                                                                         | A0A4Z2FCX0-1; A0A4Z2FCH6-1; A0A4Z2FDY0-1; A0A4Z2FCV9-1                                                                                                                                                                                                                                                                                                                                                                                                                                                              |
| <i>Plotosus lineatus</i> (Silurus lineatus)          | pltx-II; pltx-I                                                                                                                                                                                                                                                                                                                                                                                          | F2ZAL6-1; F2ZAL5-1                                                                                                                                                                                                                                                                                                                                                                                                                                                                                                  |
| <i>Takifugu flavidus</i>                             | D4764_05G0009030; D4764_05G0009020                                                                                                                                                                                                                                                                                                                                                                       | A0A5C6N0M3-1; A0A5C6N045                                                                                                                                                                                                                                                                                                                                                                                                                                                                                            |

| <i>Thalassophryne nattereri</i>                     | NATTERIN 1, NATTERIN 2, NATTERIN 3, NATTERIN 4, | Q66S25-1; Q66S21; Q66S17-1; Q66S13-1 |
|-----------------------------------------------------|-------------------------------------------------|--------------------------------------|
| Literature                                          |                                                 |                                      |
| <i>Eudontomyzon morii</i> ( <i>Lampetra morii</i> ) | N/A                                             | N/A                                  |
| <i>Plotosus canius</i>                              | N/A                                             | N/A                                  |
| <i>Trachinotus ovatus</i>                           | N/A                                             | N/A                                  |

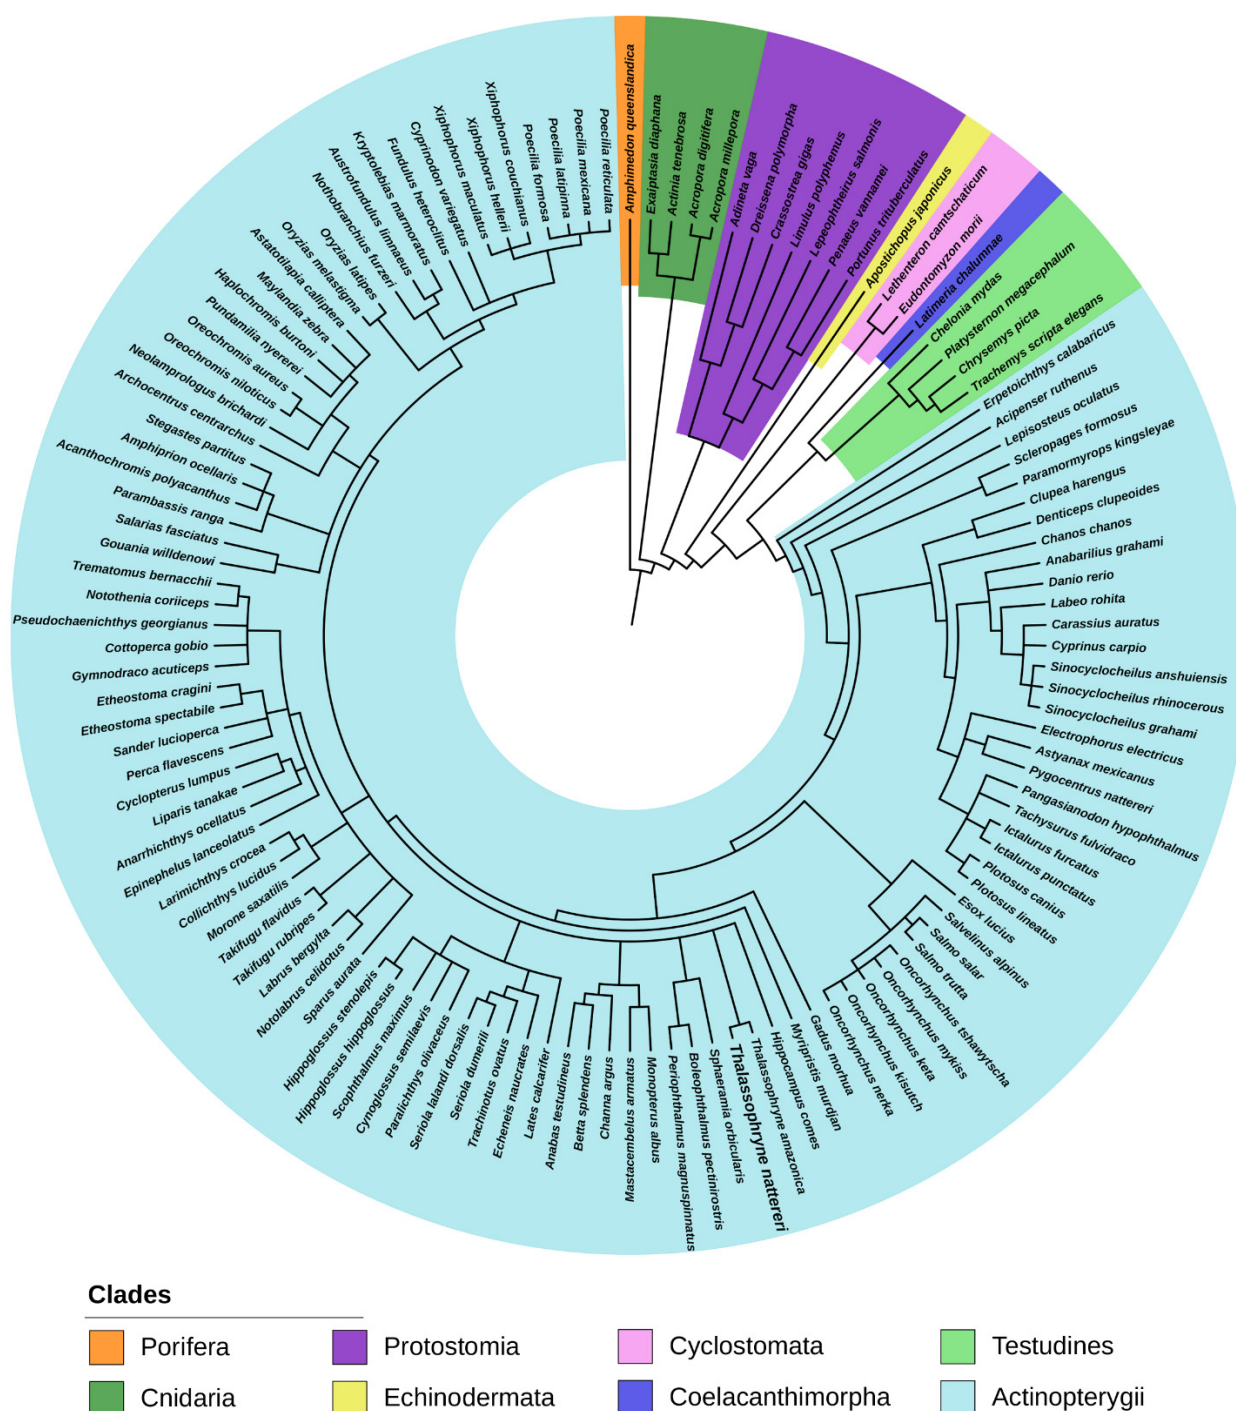

**Figure S1.** Phylogenetic tree generated using the software PhyloT to represent the aquatic species included in the group of Natterin-like proteins. There are representatives from Porifera to ray-finned fish (Actinopterygii).

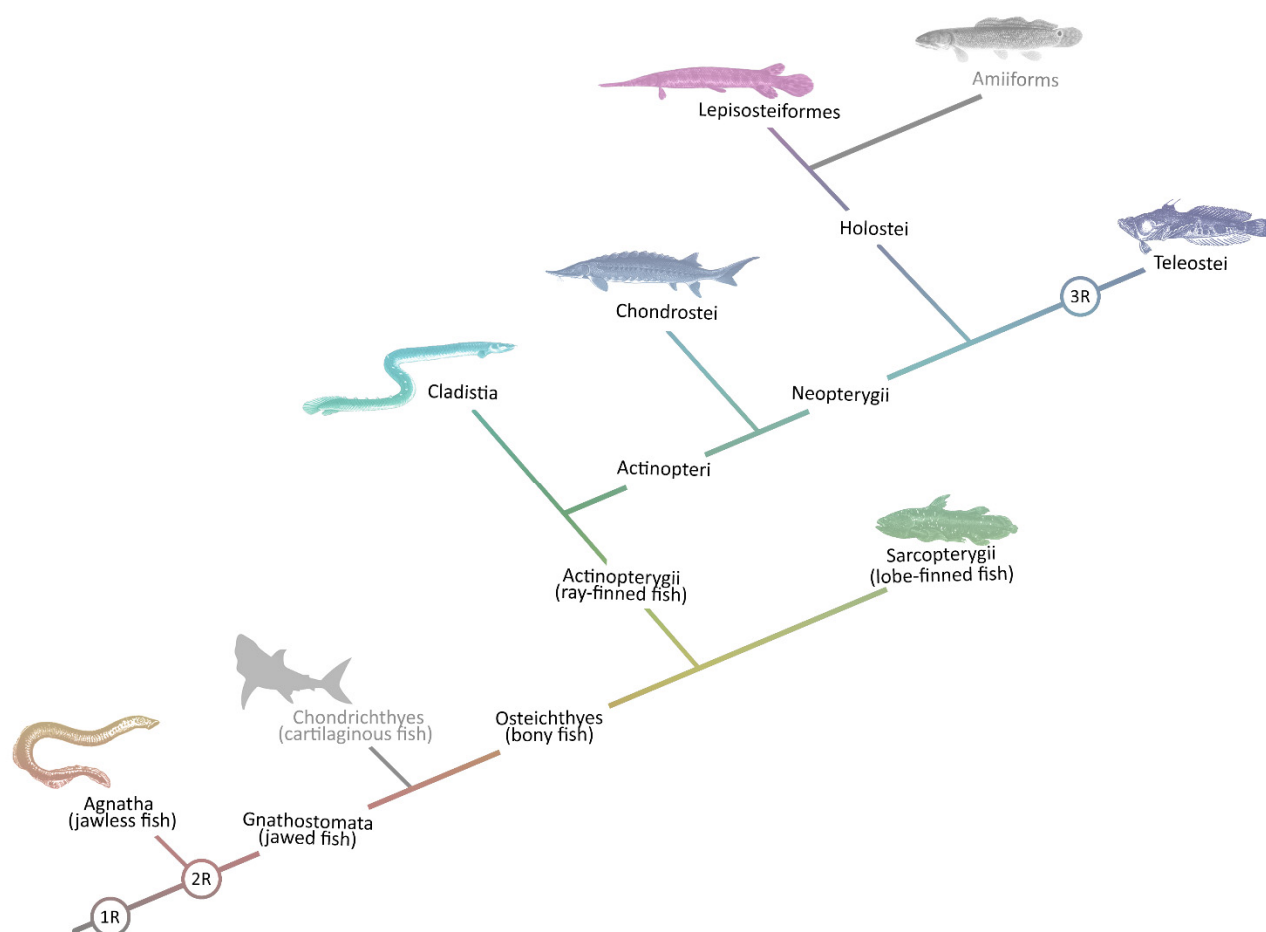

**Figure S2.** The general classification of fishes, a paraphyletic assemblage including the Agnatha, Chondrichthyes, Sarcopterygii, and Actinopterygii. Groups uncolored do not have representatives included in the group of Natterin-like proteins. The three rounds of whole-genome duplication (WGD) events are pointed to in the cladogram. .
